# Supplementary material for: The Landscape of BRCA Mutations among Egyptian Women with Breast Cancer
Source: PubMed Central journal article supplement — Oncol Ther. 2023 Sep 20;11(4):445–59. doi: 10.1007/s40487-023-00240-9 (PMC10673778; doi:10.1007/s40487-023-00240-9), 2023-09-20
Supplement: 40487_2023_240_MOESM1_ESM.pdf [file 40487_2023_240_MOESM1_ESM.pdf]

## Supplementary Materials

### The Landscape of *BRCA* Mutations Among Egyptian Women with Breast Cancer

Hamdy A. Azim<sup>1,2#</sup>, Samah A. Loutfy<sup>3,4#</sup>, Hatem A. Azim Jr<sup>2</sup>, Nermin S. Kamal<sup>2</sup>, Nasra F. Abdel Fattah<sup>3</sup>, Mostafa H. Elberry<sup>3</sup>,  
Mohamed R. Abdelaziz<sup>5</sup>, Marwa Abdelsalam<sup>2</sup>, Madonna Aziz<sup>6</sup>, Kyrillus S. Shohdy<sup>1,7</sup>, Loay Kassem<sup>1,2\*</sup>

<sup>1</sup>Clinical Oncology Department, Kasr Alainy School of Medicine, Cairo University, Cairo, Egypt

<sup>2</sup>Medical Oncology Unit, Cairo Oncology Center, Cairo, Egypt

<sup>3</sup>Virology and Immunology Unit, Cancer Biology Department, National Cancer Institute, Cairo University, Egypt

<sup>4</sup>Nanotechnology Research Center, BUE, Cairo, Egypt

<sup>5</sup>Oncology Medical Manager, Pfizer. Egypt

<sup>6</sup>Clinical Research Unit, Cairo Oncology Center, Cairo, Egypt

<sup>7</sup>Division of Cancer Sciences, The University of Manchester, Manchester, UK

#Authors contributed equally

#### \*Corresponding author

Loay Kassem.

**Affiliation:** Clinical Oncology Department, Kasr Alainy School of Medicine, Cairo University, Egypt.

**Email:** [loay.kassem@cairocure.com](mailto:loay.kassem@cairocure.com);

**Phone:** +201003022907.

**ORCID:** 0000-0001-6559-5867.

Table S1: Characteristics of individual patients with BRCA1 deleterious variants and VUS

| BRCA 1   |                                       |             |     |                      |          |          |          |       |      |       |       |
|----------|---------------------------------------|-------------|-----|----------------------|----------|----------|----------|-------|------|-------|-------|
| ID       | Variant                               | Deleterious | Age | Family history of BC | ER       | PR       | HER2     | Ki67% | TNBC | Stage | Grade |
| 20151027 | c.3008_3009delTT<br>(p.Phe1003*)      | Yes         | 21  | NA                   | Negative | Negative | Negative | 90    | Yes  | NA    | 3     |
| 20040193 | c.5095C>T (p.Arg1699Trp)              | Yes         | 31  | No                   | Positive | Positive | Negative | NA    | No   | NA    | 3     |
| 20170720 | c.5266dupC (5382insC)                 | Yes         | 37  | No                   | Positive | Positive | Negative | 50    | No   | 1     | 3     |
| 20200410 | c.5363delG                            | Yes         | 36  | Yes                  | Positive | Negative | Negative | 70    | No   | 2     | 3     |
| 20040010 | c.83_84delTG, p.Leu28fs               | Yes         | 27  | No                   | Positive | Positive | Negative | NA    | No   | NA    | 3     |
| NA       | NM_007294.4, c.5444G>A,<br>p.(W1815*) | Yes         | 33  | No                   | Negative | Negative | Negative | 30    | Yes  | NA    | 2     |
| NA       | NM_007300.3:c.5093_5096del            | Yes         | 35  | Yes                  | Negative | Negative | Negative | 80    | Yes  | 2     | 3     |
| 20200410 | c.1648A>C, c.1456T>C,<br>c.536A>G,    | VUS         | 36  | Yes                  | Positive | Negative | Negative | 70    | No   | 2     | 3     |

|          |                                     |     |    |     |          |          |          |    |     |    |   |
|----------|-------------------------------------|-----|----|-----|----------|----------|----------|----|-----|----|---|
| 20171300 | c.3526G>A, p.(Val1176Ile)           | VUS | 40 | Yes | Positive | Positive | Negative | 3  | No  | 1  | 2 |
| 20161038 | Exon 10 (1591T)                     | VUS | 50 | NA  | Positive | Positive | Negative | 10 | No  | 4  | 2 |
| 20140825 | c.4308T>C                           | VUS | 36 | Yes | Negative | Negative | Negative | 10 | Yes | NA | 3 |
| 20181480 | c.3737C>A, p.Thr1246Asn<br>(T1246N) | VUS | 41 | Yes | Positive | Positive | Negative | 4  | No  | 2  | 2 |
| 20090882 | c.4776C>G, p.Asn1592Lys             | VUS | 51 | Yes | Positive | Positive | Negative | NA | No  | NA | 3 |
| 20131406 | c.5332+7G>A                         | VUS | 27 | Yes | Positive | Positive | Negative | 8  | No  | 1  | 2 |

Table S2: Characteristics of individual patients with BRCA2 deleterious variants and VUS

| BRCA 2   |                                                     |             |     |                      |          |          |          |       |      |       |       |
|----------|-----------------------------------------------------|-------------|-----|----------------------|----------|----------|----------|-------|------|-------|-------|
| ID       | Variant                                             | Deleterious | Age | Family history of BC | ER       | PR       | HER2     | Ki67% | TNBC | Stage | Grade |
| 20170720 | exon 9 (frame shift 999 del) - Exon 11 F            | Yes         | 37  | No                   | Positive | Positive | Negative | 50    | No   | 1     | 3     |
| NA       | NM_000059.3, c.5722_5723del, p.(L1908Rfs*2)         | Yes         | 49  | No                   | Positive | Positive | Negative | NA    | No   | NA    | 2     |
| 20210396 | c.4284dup                                           | Yes         | 34  | No                   | Positive | Positive | Negative | 35    | No   | NA    | 3     |
| 20130514 | chr13:32912530delT c.4038delT (p.Val1347PhefsTer27) | Yes         | 33  | Yes                  | Positive | Positive | Negative | 70    | No   | NA    | 2     |
| 20190919 | c.4478_4481del (p.Glu1493fs)                        | Yes         | 32  | Yes                  | Positive | Positive | Negative | 18    | No   | 3     | 2     |
| 20200797 | c.6771C>T (p.Pro2257Pro)                            | VUS         | 51  | Yes                  | Positive | Negative | Positive | 15    | No   | 4     | 2     |

|          |                                             |     |    |     |          |          |          |    |     |    |   |
|----------|---------------------------------------------|-----|----|-----|----------|----------|----------|----|-----|----|---|
| 20161334 | c.9206G>T,<br>p.(Cys3069Phe)                | VUS | 61 | Yes | Positive | Positive | Positive | NA | No  | 4  | 2 |
| 20010535 | c.1607C>A,<br>p.(Ser536Tyr)                 | VUS | 42 | NA  | Negative | Negative | Negative | NA | Yes | 1  | 2 |
| 20210358 | c.692G>C,<br>p.(Ser231Thr)                  | VUS | 66 | Yes | Positive | Positive | Negative | 5  | No  | NA | 2 |
| 20170056 | c.6513G>T, p.V2171V,<br>c.1011C>T, p. N337N | VUS | 38 | NA  | Positive | Positive | Negative | 12 | No  | 2  | 2 |
| 20131406 | c.571G>T,<br>p.Asp191Tyr (D191Y)            | VUS | 27 | Yes | Positive | Positive | Negative | 8  | No  | 1  | 2 |
